# Supplementary material for: Interactive software tool to comprehend the calculation of optimal sequence alignments with dynamic programming
Source: PubMed Central journal article supplement — Bioinformatics. 2010 May 14;26(13):1664–5. doi: 10.1093/bioinformatics/btq252 (PMC2887054; doi:10.1093/bioinformatics/btq252), 2010-05-14
Supplement: btq252_1.pdf [file btq252_1.pdf]

### Bioinformatics CONFLICT OF INTEREST FORM

Title: INTERACTIVE SOFTWARE TOOL TO COMPREHEND THE CALCULATION OF OPTIMAL SEQUENCE ALIGNMENT WITH DYNAMIC PROGRAMMING  
Author(s): IGNACIO IRALDO, FRANCISCO MELL Ms number: 6701NF-2010-04738

**PLEASE NOTE:** As an integral part of the online submission process, Corresponding authors are required to confirm whether they or their co-authors have any conflicts of interest to declare, and to provide details of these. If the Corresponding author is unable to confirm this information on behalf of all co-authors, the authors in question are required to complete and fax this Conflict of Interest form to the Editorial Office at +44 (0)1865 355903 . It is the Corresponding author's responsibility to ensure that all authors adhere to this policy.

**MANUSCRIPT AUTHORS:** If you have been asked to do so by the Corresponding author, please complete **Part I** or **II**. At the point of submission, *Bioinformatics* policy requires that each author reveal any financial interests or connections, direct or indirect, or other situations *that might raise the question of bias* in the work reported or the conclusions, implications, or opinions stated - including pertinent commercial or other sources of funding for the individual author(s) or for the associated department(s) or organization(s), personal relationships, or direct academic competition.

**When considering whether you should declare a conflicting interest or connection please consider the conflict of interest test: Is there any arrangement that would embarrass you or any of your co-authors if it was to emerge after publication and you had not declared it?**

If the manuscript is published, this information will be communicated in a statement in the published paper.

**I. There have been no involvements that might raise the question of bias in the work reported or in the conclusions, implications, or opinions stated.**

FRANCISCO MELL

Printed name

Signature

MAY 11<sup>TH</sup> 2010  
Date

**OR**

**II. Conflict of interest statement.**

Sample statement: I hold stock\* in [business name], the makers of [product], and am currently conducting research sponsored by this company. I am also a member of the speakers' bureau for [business name].

\* Please provide details of stock where this reveals a pertinent conflict of interest.

My statement is as follows:

Printed name

Signature

Date
